# Supplementary material
Source: publisher site journal article supplement (https://www.spandidos-publications.com/5755/downloadSupplementary)
Supplement: Supplementary file 1 [file downloadSupplementary]

## Sheet: Sheet1
Table SII. Quality of the transcriptome sequencing.
Sample	Raw reads, n	Clean reads, n	Clean bases, n	Error rate	Q20, %	Q30, %	GC, %
P_K1	45535920	43775810	6.57G	0.02	98.33	95.09	48.6
P_K2	44139150	43071646	6.46G	0.02	98.21	94.47	48.71
P_K3	45730632	44406156	6.66G	0.02	98.32	94.94	48.35
P_K4	45882796	44208044	6.63G	0.02	98.25	94.8	48.6
P_K5	43798942	42719804	6.41G	0.02	98.14	94.52	48.47
H_K1	46244654	44711452	6.71G	0.02	98.35	95	46.97
H_K2	46442944	45012502	6.75G	0.02	98.34	94.99	48.19
H_K3	44712114	43407818	6.51G	0.02	98.3	94.81	47.99
H_K4	46629204	44948988	6.74G	0.02	98.43	95.22	47.3
H_K5	44913840	42662742	6.4G	0.02	98.24	94.76	47.82
